# Supplementary material for: Five new rubidium borates with 0D clusters, 1D chains, 2D layers and 3D frameworks
Source: Royal Society of Chemistry journal article supplement (doi:10.1039/d1ce00944c), 2021-01-01
Supplement: d1ce00944c1.pdf [file d1ce00944c1.pdf]

## Supporting Information

### Five new rubidium borates with 0D cluster, 1D chain, 2D layer and 3D framework

Qi-Ming Qiu, Ke-Ning Sun and Guo-Yu Yang\*

*MOE Key Laboratory of Cluster Science, School of Chemistry and Chemical Engineering, Beijing Institute of Technology, Beijing 100081, China. E-mail: ygy@bit.edu.cn; ygy@ffjirsm.ac.cn, Fax: (+86)10-6891-8572*

#### Table of Contents

|                                                                                                                                                                                   |           |
|-----------------------------------------------------------------------------------------------------------------------------------------------------------------------------------|-----------|
| <b>Table S1</b> Selected bond distances (Å) and angles (°) for compound <b>1</b> .....                                                                                            | <b>1</b>  |
| <b>Table S2</b> Selected bond distances (Å) and angles (°) for compound <b>2</b> .....                                                                                            | <b>1</b>  |
| <b>Table S3</b> Selected bond distances (Å) and angles (°) for compound <b>3</b> .....                                                                                            | <b>2</b>  |
| <b>Table S4</b> Selected bond distances (Å) and angles (°) for compound <b>4</b> .....                                                                                            | <b>4</b>  |
| <b>Table S5</b> Selected bond distances (Å) and angles (°) for compound <b>5</b> .....                                                                                            | <b>5</b>  |
| <b>Fig. S1</b> View of the supramolecular 2D structure of compound <b>1</b> .....                                                                                                 | <b>6</b>  |
| <b>Fig. S2</b> Structure of compounds <b>1</b> and <b>1a</b> .....                                                                                                                | <b>6</b>  |
| <b>Fig. S3</b> Asymmetric unit of compound <b>3</b> .....                                                                                                                         | <b>7</b>  |
| <b>Fig. S4</b> 3D supramolecular structure of compound <b>2</b> .....                                                                                                             | <b>7</b>  |
| <b>Fig. S5</b> Structure of compound <b>2a</b> .....                                                                                                                              | <b>7</b>  |
| <b>Fig. S6</b> View of the Rb–O framework of <b>4</b> along the <i>b</i> axis .....                                                                                               | <b>8</b>  |
| <b>Fig. S7</b> Structure of compounds <b>4</b> , <b>4a</b> and <b>4b</b> .....                                                                                                    | <b>8</b>  |
| <b>Fig. S8</b> Structure of compound <b>5</b> .....                                                                                                                               | <b>9</b>  |
| <b>Fig. S9</b> PXRD patterns show the comparison between the experimental value and calculated ones for compounds <b>1(a)</b> , <b>2–3(b)</b> , <b>4(c)</b> and <b>5(d)</b> ..... | <b>10</b> |
| <b>Fig. S10</b> TG curves for compounds <b>1(a)</b> , <b>2–3(b)</b> , <b>4(c)</b> and <b>5(d)</b> .....                                                                           | <b>11</b> |
| <b>Fig. S11</b> IR spectra for compounds <b>1(a)</b> , <b>2–3(b)</b> , <b>4(c)</b> and <b>5(d)</b> .....                                                                          | <b>12</b> |
| <b>Fig. S12</b> UV/Vis diffuse reflectance spectra of compounds <b>1(a)</b> , <b>2(b)</b> , <b>3(c)</b> , <b>4(d)</b> and <b>5(e)</b> .....                                       | <b>13</b> |
| <b>Fig. S13</b> Oscilloscope traces of SHG signals for compounds <b>4</b> and LiNbO <sub>3</sub> .....                                                                            | <b>14</b> |
| <b>Table S6</b> The direction and magnitude (in Debye) of the polyhedral dipole moments for compound <b>1</b> .....                                                               | <b>14</b> |

**Table S1** Selected bond distances (Å) and angles (°) for compound **1**.

|                         |           |                        |           |
|-------------------------|-----------|------------------------|-----------|
| Rb—O1 <sup>ii</sup>     | 3.083 (5) | Na—O5 <sup>vii</sup>   | 2.380 (4) |
| Rb—O1 <sup>iv</sup>     | 3.128 (4) | Na—O5 <sup>viii</sup>  | 2.380 (4) |
| Rb—O2 <sup>iii</sup>    | 3.110 (4) | B1—O1                  | 1.371 (8) |
| Rb—O3                   | 2.916 (4) | B1—O2                  | 1.370 (7) |
| Rb—O3 <sup>i</sup>      | 2.976 (4) | B1—O3                  | 1.369 (8) |
| Rb—O5                   | 3.009 (4) | B2—O2 <sup>ix</sup>    | 1.489 (7) |
| Rb—O5 <sup>v</sup>      | 3.160 (4) | B2—O3                  | 1.494 (7) |
| Na—O5                   | 2.380 (4) | B2—O4                  | 1.453 (7) |
| Na—O5 <sup>i</sup>      | 2.380 (4) | B2—O5                  | 1.453 (7) |
| Na—O5 <sup>v</sup>      | 2.380 (4) | O1—H1                  | 0.8434    |
| Na—O5 <sup>vi</sup>     | 2.380 (4) | O5—H5                  | 0.8458    |
| O3—B1—O2                | 122.6 (5) | O5—B2—O4               | 111.2 (5) |
| O3—B1—O1                | 118.4 (5) | O5—B2—O2 <sup>ix</sup> | 109.6 (4) |
| O2—B1—O1                | 119.0 (5) | O4—B2—O2 <sup>ix</sup> | 110.0 (5) |
| O2 <sup>ix</sup> —B2—O3 | 108.1 (5) | O5—B2—O3               | 108.1 (4) |
| O4—B2—O3                | 109.7 (4) |                        |           |

Symmetry codes: (i)  $x - y, -y, -z + 1$ ; (ii)  $-x + 1, -x + y + 1, -z + 1$ ; (iii)  $-y + 1/3, x - y - 1/3, z - 1/3$ ; (iv)  $-x + y + 1, -x + 1, z$ ; (v)  $y, x, -z + 1$ ; (vi)  $-x, -x + y, -z + 1$ ; (vii)  $-x + y, -x, z$ ; (viii)  $-y, x - y, z$ ; (ix)  $-x + 2/3, -x + y + 1/3, -z + 4/3$ .

**Table S2** Selected bond distances (Å) and angles (°) for compound **2**.

|                        |           |                      |           |
|------------------------|-----------|----------------------|-----------|
| Rb1—O1 <sup>iii</sup>  | 3.086 (3) | B1—O1                | 1.376 (5) |
| Rb1—O2                 | 2.887 (2) | B1—O2                | 1.337 (4) |
| Rb1—O3 <sup>i</sup>    | 3.097 (2) | B1—O3                | 1.376 (4) |
| Rb1—O4 <sup>ii</sup>   | 2.930 (2) | B2—O2                | 1.464 (4) |
| Rb1—O6 <sup>i</sup>    | 2.895 (3) | B2—O4                | 1.453 (4) |
| Rb1—O7 <sup>ii</sup>   | 3.242 (2) | B2—O5                | 1.486 (4) |
| Rb1—O9 <sup>iv</sup>   | 3.183 (3) | B2—O11 <sup>ix</sup> | 1.474 (4) |
| Rb1—O10 <sup>iv</sup>  | 2.986 (2) | B3—O3                | 1.401 (4) |
| Rb1—O11 <sup>iii</sup> | 2.941 (2) | B3—O5                | 1.350 (5) |
| Rb2—O1 <sup>i</sup>    | 3.021 (3) | B3—O6                | 1.345 (4) |
| Rb2—O3 <sup>iii</sup>  | 3.326 (2) | B4—O4                | 1.350 (4) |
| Rb2—O4 <sup>viii</sup> | 3.018 (2) | B4—O7                | 1.360 (4) |
| Rb2—O5                 | 2.934 (2) | B4—O8                | 1.387 (4) |
| Rb2—O6 <sup>iii</sup>  | 3.316 (3) | B5—O6 <sup>vii</sup> | 1.475 (4) |

|                           |            |                          |           |
|---------------------------|------------|--------------------------|-----------|
| Rb2—O7 <sup>viii</sup>    | 3.328 (2)  | B5—O7                    | 1.483 (4) |
| Rb2—O9 <sup>vi</sup>      | 2.928 (2)  | B5—O9                    | 1.444 (4) |
| Rb2—O10 <sup>vii</sup>    | 3.008 (2)  | B5—O10                   | 1.465 (4) |
| Rb2—O11 <sup>iii</sup>    | 3.062 (2)  | B6—O8                    | 1.402 (4) |
| O1—H1                     | 0.796 (19) | B6—O10                   | 1.363 (4) |
| O9—H9                     | 0.78 (4)   | B6—O11                   | 1.338 (4) |
| O2—B1—O1                  | 121.4 (3)  | O4—B4—O7                 | 117.1 (3) |
| O2—B1—O3                  | 122.7 (3)  | O4—B4—O8                 | 123.0 (3) |
| O1—B1—O3                  | 115.9 (3)  | O7—B4—O8                 | 119.8 (3) |
| O4—B2—O5                  | 110.1 (3)  | O9—B5—O10                | 111.6 (3) |
| O2—B2—O5                  | 111.4 (3)  | O9—B5—O6 <sup>vii</sup>  | 109.1 (3) |
| O11 <sup>iii</sup> —B2—O5 | 107.1 (3)  | O10—B5—O6 <sup>vii</sup> | 111.9 (3) |
| O4—B2—O2                  | 110.8 (3)  | O9—B5—O7                 | 105.6 (3) |
| O4—B2—O11 <sup>iii</sup>  | 110.3 (3)  | O10—B5—O7                | 111.3 (3) |
| O2—B2—O11 <sup>iii</sup>  | 107.0 (3)  | O6 <sup>vii</sup> —B5—O7 | 107.1 (3) |
| O6—B3—O5                  | 125.3 (3)  | O11—B6—O10               | 125.2 (3) |
| O6—B3—O3                  | 114.0 (3)  | O11—B6—O8                | 115.6 (3) |
| O5—B3—O3                  | 120.7 (3)  | O10—B6—O8                | 119.3 (3) |

Symmetry codes: (i)  $-x + 1, y + 1/2, -z + 1/2$ ; (ii)  $-x + 1, -y + 2, -z + 1$ ; (iii)  $x, y + 1, z$ ; (iv)  $-x + 1, -y + 1, -z + 1$ ; (v)  $x - 1, -y + 3/2, z - 1/2$ ; (vi)  $x, -y + 3/2, z - 1/2$ ; (vii)  $-x + 2, -y + 1, -z + 1$ ; (viii)  $-x + 2, -y + 2, -z + 1$ ; (ix)  $x, y - 1, z$ .

**Table S3** Selected bond distances (Å) and angles (°) for compound **3**.

|                       |           |                     |            |
|-----------------------|-----------|---------------------|------------|
| Rb—O1                 | 2.853 (6) | B1—O1               | 1.451 (10) |
| Rb—O2 <sup>ii</sup>   | 2.988 (5) | B1—O2               | 1.467 (10) |
| Rb—O3 <sup>iii</sup>  | 3.318 (5) | B1—O3               | 1.487 (10) |
| Rb—O4 <sup>v</sup>    | 3.055 (5) | B1—O8 <sup>x</sup>  | 1.464 (10) |
| Rb—O6 <sup>iii</sup>  | 3.020 (6) | B2—O2               | 1.340 (11) |
| Rb—O7 <sup>i</sup>    | 2.887 (5) | B2—O4               | 1.345 (11) |
| Rb—O7 <sup>iii</sup>  | 3.357 (6) | B2—O5               | 1.402 (10) |
| Rb—O8 <sup>v</sup>    | 3.309 (6) | B3—O3               | 1.356 (11) |
| Rb—O9 <sup>v</sup>    | 3.302 (6) | B3—O5               | 1.390 (10) |
| Rb—O11 <sup>iv</sup>  | 3.030 (7) | B3—O6               | 1.347 (10) |
| Ba—O1 <sup>iv</sup>   | 3.085 (6) | B4—O4 <sup>ix</sup> | 1.463 (10) |
| Ba—O2 <sup>iv</sup>   | 2.914 (5) | B4—O6               | 1.446 (11) |
| Ba—O3 <sup>viii</sup> | 3.230 (5) | B4—O7               | 1.497 (10) |

|                        |           |                           |            |
|------------------------|-----------|---------------------------|------------|
| Ba—O4 <sup>vii</sup>   | 2.837 (6) | B4—O10                    | 1.466 (11) |
| Ba—O6 <sup>viii</sup>  | 2.864 (6) | B5—O7                     | 1.342 (11) |
| Ba—O8 <sup>vi</sup>    | 2.818 (6) | B5—O8                     | 1.341 (11) |
| Ba—O9 <sup>vi</sup>    | 3.000 (6) | B5—O9                     | 1.403 (11) |
| Ba—O10                 | 2.804 (5) | B6—O9                     | 1.365 (11) |
| Ba—O11 <sup>vii</sup>  | 3.006 (6) | B6—O10                    | 1.347 (11) |
| O1—H1                  | 0.8146    | B6—O11                    | 1.374 (11) |
| O11—H11                | 0.8190    |                           |            |
| O1—B1—O8 <sup>x</sup>  | 109.2 (7) | O6—B4—O4 <sup>vii</sup>   | 111.0 (7)  |
| O1—B1—O2               | 111.7 (6) | O6—B4—O10                 | 111.1 (7)  |
| O8 <sup>x</sup> —B1—O2 | 112.6 (6) | O4 <sup>vii</sup> —B4—O10 | 106.8 (7)  |
| O1—B1—O3               | 105.2 (6) | O6—B4—O7                  | 109.7 (7)  |
| O8 <sup>x</sup> —B1—O3 | 106.8 (6) | O4 <sup>vii</sup> —B4—O7  | 107.4 (6)  |
| O2—B1—O3               | 111.1 (6) | O10—B4—O7                 | 110.9 (7)  |
| O2—B2—O4               | 125.4 (7) | O8—B5—O7                  | 125.6 (8)  |
| O2—B2—O5               | 119.9 (7) | O8—B5—O9                  | 113.3 (8)  |
| O4—B2—O5               | 114.7 (8) | O7—B5—O9                  | 121.1 (8)  |
| O6—B3—O3               | 117.5 (7) | O10—B6—O9                 | 123.0 (8)  |
| O6—B3—O5               | 123.0 (8) | O10—B6—O11                | 120.5 (8)  |
| O3—B3—O5               | 119.5 (7) | O9—B6—O11                 | 116.4 (7)  |

---

Symmetry codes: (i)  $x, -y + 1/2, z - 1/2$ ; (ii)  $-x, y - 1/2, -z + 1/2$ ; (iii)  $-x, y + 1/2, -z + 1/2$ ; (iv)  $-x + 1, -y + 1, -z + 1$ ; (v)  $x, -y + 3/2, z - 1/2$ ; (vi)  $-x + 1, y - 1/2, -z + 3/2$ ; (vii)  $x, y - 1, z$ ; (viii)  $-x + 1, -y, -z + 1$ ; (ix)  $x, y + 1, z$ ; (x)  $-x, -y + 1, -z + 1$ .

**Table S4** Selected bond distances (Å) and angles (°) for compound **4**.

|                          |           |                        |            |
|--------------------------|-----------|------------------------|------------|
| Rb1—O1                   | 3.141 (2) | B1—O1                  | 1.363 (4)  |
| Rb1—O2                   | 2.909 (2) | B1—O2                  | 1.374 (5)  |
| Rb1—O3 <sup>vii</sup>    | 2.889 (3) | B1—O3                  | 1.361 (4)  |
| Rb1—O5 <sup>ix</sup>     | 3.380 (3) | B2—O1 <sup>xi</sup>    | 1.463 (4)  |
| Rb1—O6 <sup>i</sup>      | 2.736 (2) | B2—O2                  | 1.467 (4)  |
| Rb1—O6 <sup>iii</sup>    | 2.841 (2) | B2—O4                  | 1.492 (5)  |
| Rb1—O8 <sup>ii</sup>     | 3.419 (3) | B2—O5                  | 1.457 (5)  |
| Rb1—O9 <sup>viii</sup>   | 3.056 (3) | B3—O3                  | 1.483 (4)  |
| Rb1—O9 <sup>x</sup>      | 3.479 (3) | B3—O5                  | 1.431 (4)  |
| Rb2—O1 <sup>v</sup>      | 3.304 (2) | B3—O6                  | 1.496 (5)  |
| Rb2—O2 <sup>v</sup>      | 2.919 (2) | B3—O7                  | 1.514 (4)  |
| Rb2—O3 <sup>vi</sup>     | 2.957 (3) | B4—O4 <sup>i</sup>     | 1.340 (5)  |
| Rb2—O4                   | 2.807 (3) | B4—O6                  | 1.355 (5)  |
| Rb2—O5                   | 3.258 (3) | B4—O8                  | 1.408 (5)  |
| Rb2—O7                   | 3.067 (3) | B5—O7                  | 1.347 (5)  |
| Rb2—O7 <sup>iv</sup>     | 2.895 (2) | B5—O8                  | 1.391 (5)  |
| Rb2—O8 <sup>i</sup>      | 2.939 (3) | B5—O9                  | 1.358 (5)  |
| Rb2—O9                   | 3.428 (3) | O9—H9                  | 0.818 (14) |
| O3—B1—O1                 | 124.8 (3) | O3—B3—O7               | 106.7 (3)  |
| O3—B1—O2                 | 121.3 (3) | O5—B3—O7               | 112.6 (3)  |
| O1—B1—O2                 | 113.9 (3) | O6—B3—O7               | 106.3 (3)  |
| O1 <sup>xii</sup> —B2—O4 | 107.9 (3) | O4 <sup>i</sup> —B4—O6 | 125.6 (3)  |
| O1 <sup>xii</sup> —B2—O2 | 110.4 (3) | O4 <sup>i</sup> —B4—O8 | 115.5 (3)  |
| O2—B2—O4                 | 109.0 (3) | O6—B4—O8               | 118.9 (3)  |
| O5—B2—O1 <sup>xii</sup>  | 110.9 (3) | O7—B5—O9               | 123.8 (3)  |
| O5—B2—O2                 | 110.8 (3) | O7—B5—O8               | 121.5 (3)  |
| O5—B2—O4                 | 107.7 (3) | O9—B5—O8               | 114.6 (3)  |
| O3—B3—O6                 | 108.6 (3) |                        |            |

Symmetry codes: (i)  $-x + 3/2, y, z - 1/2$ ; (ii)  $-x + 3/2, y - 1, z - 1/2$ ; (iii)  $-x + 1, -y + 2, z - 1/2$ ; (iv)  $x - 1/2, -y + 1, z$ ; (v)  $x, y - 1, z$ ; (vi)  $x + 1/2, -y + 1, z$ ; (vii)  $-x + 1, -y + 2, z + 1/2$ ; (viii)  $-x + 3/2, y + 1, z + 1/2$ ; (ix)  $-x + 3/2, y, z + 1/2$ ; (x)  $-x + 1, -y + 1, z + 1/2$ ; (xi)  $x - 1/2, -y + 2, z$ ; (xii)  $x + 1/2, -y + 2, z$ .

**Table S5** Selected bond distances (Å) and angles (°) for compound **5**.

|                        |             |                                      |             |
|------------------------|-------------|--------------------------------------|-------------|
| Na—O1 <sup>i</sup>     | 2.4093 (12) | B1—O3                                | 1.361 (2)   |
| Na—O3 <sup>i</sup>     | 2.3203 (14) | B2—O1                                | 1.4571 (19) |
| Rb—O1                  | 3.5750 (12) | B2—O2 <sup>ii</sup>                  | 1.4466 (19) |
| Rb—O2 <sup>iii</sup>   | 2.9149 (11) | B2—O3 <sup>iv</sup>                  | 1.452 (2)   |
| B1—O1                  | 1.378 (2)   | B2—O4                                | 1.5313 (16) |
| B1—O2                  | 1.356 (2)   |                                      |             |
| O2—B1—O3               | 123.49 (15) | O2 <sup>v</sup> —B2—O3 <sup>vi</sup> | 112.63 (13) |
| O2—B1—O1               | 122.20 (14) | O2 <sup>v</sup> —B2—O1               | 109.59 (13) |
| O3—B1—O1               | 114.31 (16) | O3 <sup>vi</sup> —B2—O1              | 110.55 (12) |
| O1—B2—O4               | 107.88 (12) | O3 <sup>vi</sup> —B2—O4              | 107.25 (13) |
| O2 <sup>v</sup> —B2—O4 | 108.79 (11) |                                      |             |

Symmetry codes: (i)  $-x + 1, -y + 1, -z + 1$ ; (ii)  $-z + 1/2, -x + 1, y - 1/2$ ; (iii)  $-x + 1/2, -y + 1, z - 1/2$ ; (iv)  $y - 1/2, z, -x + 1/2$ ; (v)  $-y + 1, z + 1/2, -x + 1/2$ ; (vi)  $-z + 1/2, x + 1/2, y$ .

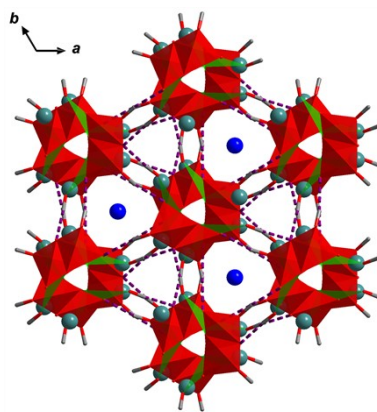

**Fig. S1** View of the supramolecular 2D structure of compound **1** along the *c* axis. Color code for atom: Na: blue, Rb: teal. Color code for polyhedra: BO<sub>4</sub>: red, BO<sub>3</sub>: green, similarly hereinafter.

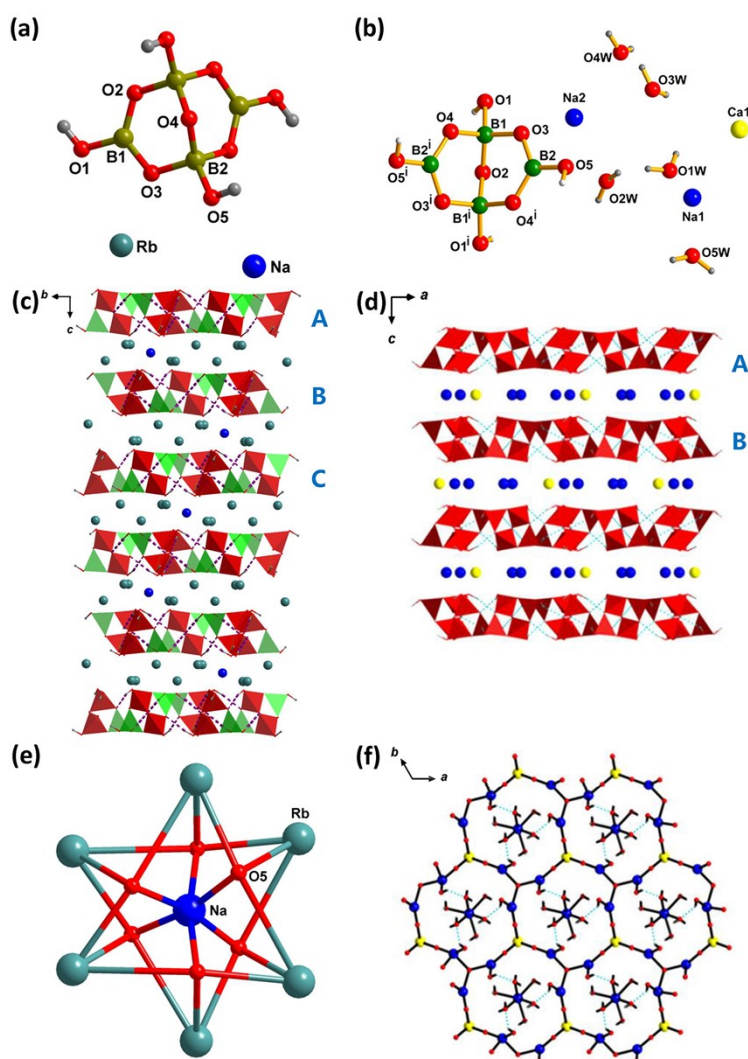

**Fig. S2** Structure of compounds **1** (a) and **1a** (b). Symmetry codes: (i)  $1 + x - y, 2 - y, 1 - z$ . The arrangement of supramolecular structure of compounds **1** (c) and **1a** (d). View of the 0D Na–O–Rb cluster of **1** (e) and the 2D Na–O–Ca layer of **1a** (f).

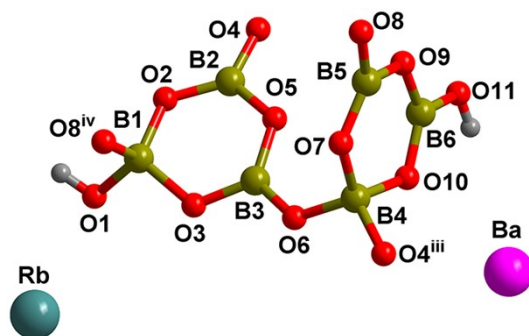

**Fig. S3** Asymmetric unit of compound **3**. Symmetry codes: (i)  $x, -1 + y, z$ ; (ii)  $-x, 1 - y, 1 - z$ .

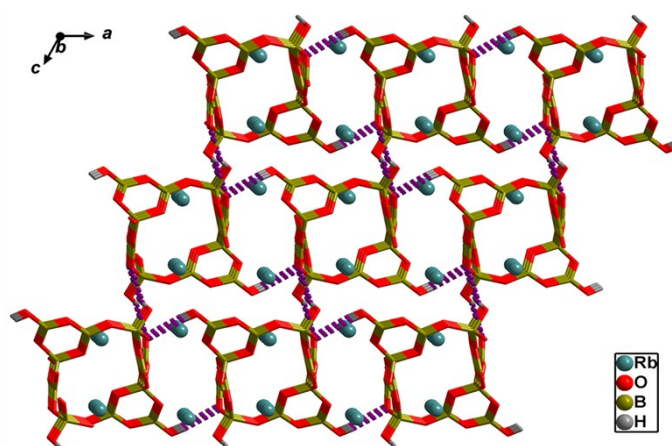

**Fig. S4** 3D supramolecular structure of compound **2** along the  $b$  axis connected by O9–H9 $\cdots$ O7 hydrogen bonds (2.354 Å, 3.041 Å, 148°, dashed lines) with the charge balancing Rb<sup>+</sup> ions.

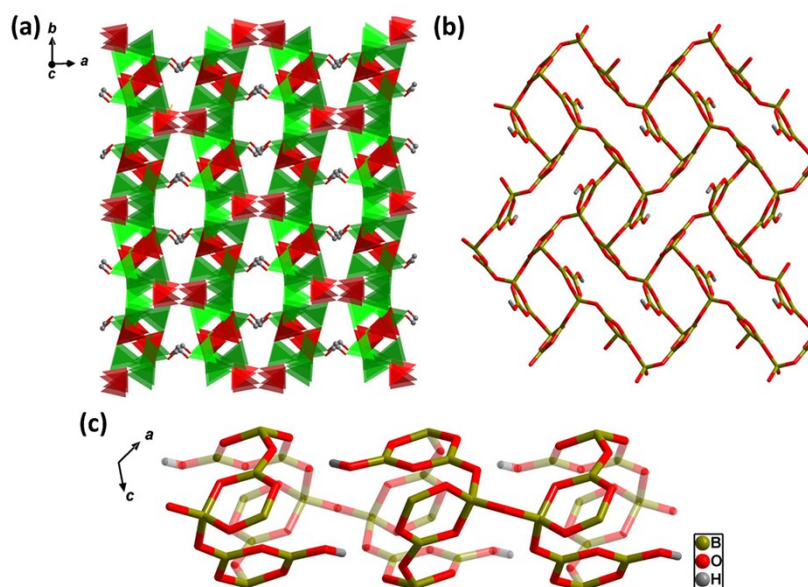

**Fig. S5** (a) 3D framework of compound **2a** along the  $c$  axis. (b) 2D layer of **2a** assuming O11 atoms are protonated. (c) 1D chain of **2a** assuming O6 atoms are protonated.



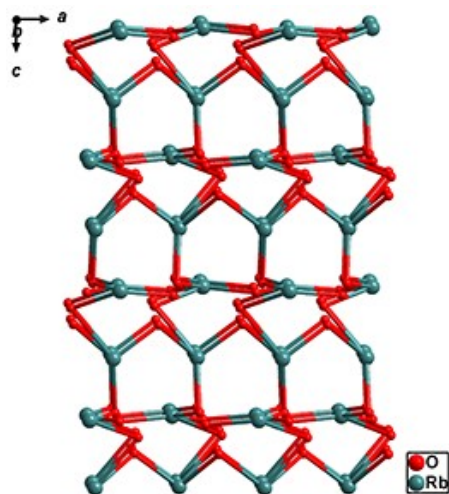

Fig. S6 View of the Rb–O framework of **4** along the *b* axis.

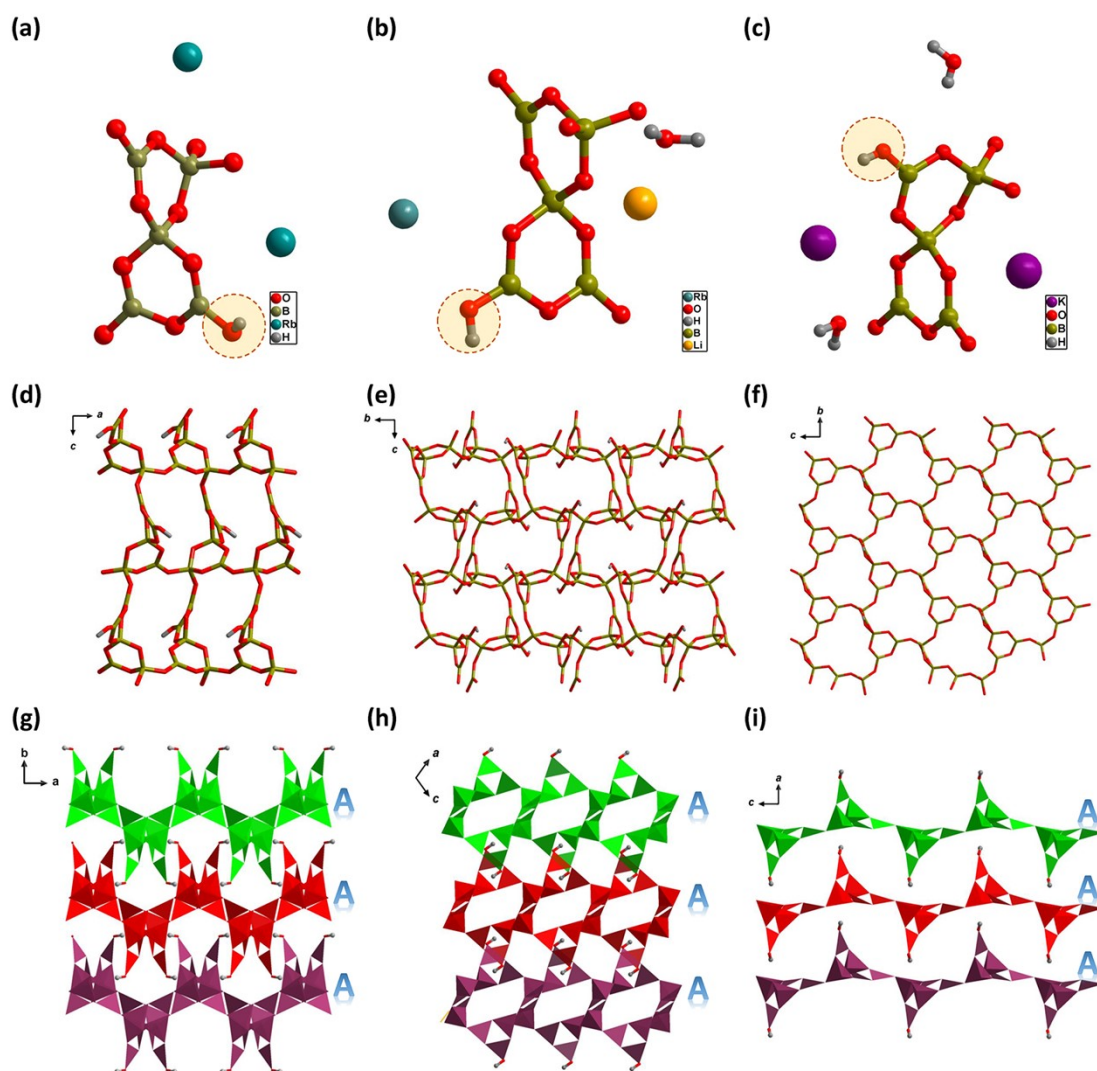

Fig. S7 Asymmetric unit of compounds **4** (a), **4a** (b) and **4b** (c). The 2D layers with 3- and 9-MR in **4**(d), 8- and 10-MR in **4a**(e), 3- and 9-MR in **4b**(f). The arrangements of **4** (g), **4a** (h) and **4b** (i).

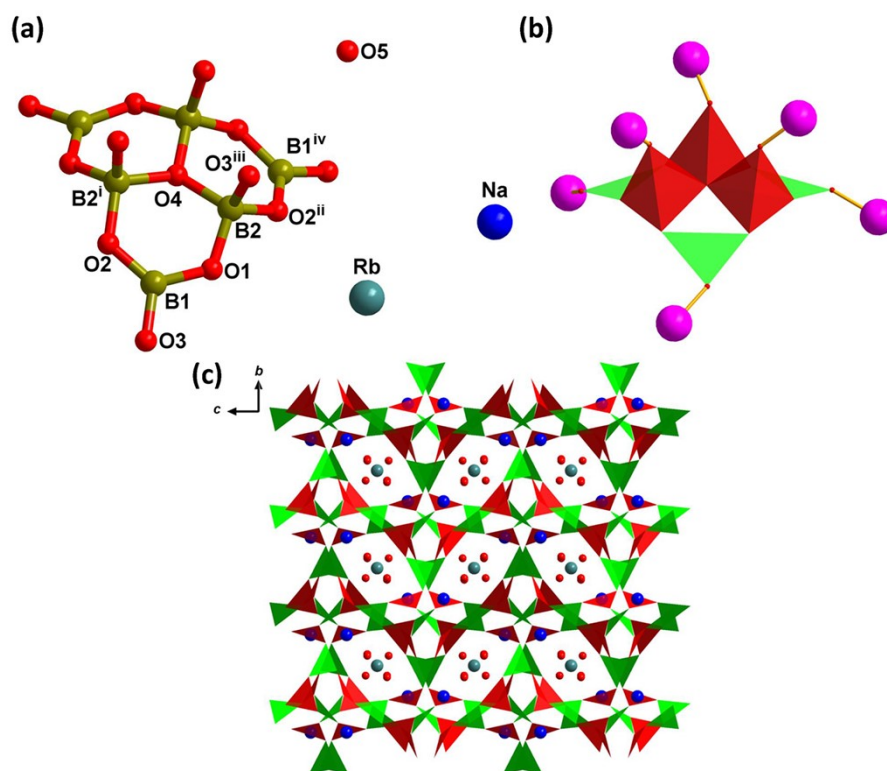

**Fig. S8** (a) View of the structure of compound **5**, symmetry codes: (i)  $0.5 - z, 1 - x, -0.5 + y$ ; (ii)  $1 - y, 0.5 + z, 0.5 - x$ ; (iii)  $0.5 - z, 0.5 + x, y$ ; (iv)  $1 - y, 0.5 + z, 0.5 - x$ . (b) View of the linkage of  $\{B_6O_{13}\}$  cluster units, in which the  $\{B_6O_{13}\}$  clusters are shown as pink nodes. (c) 3D framework viewed along the *a* axis.

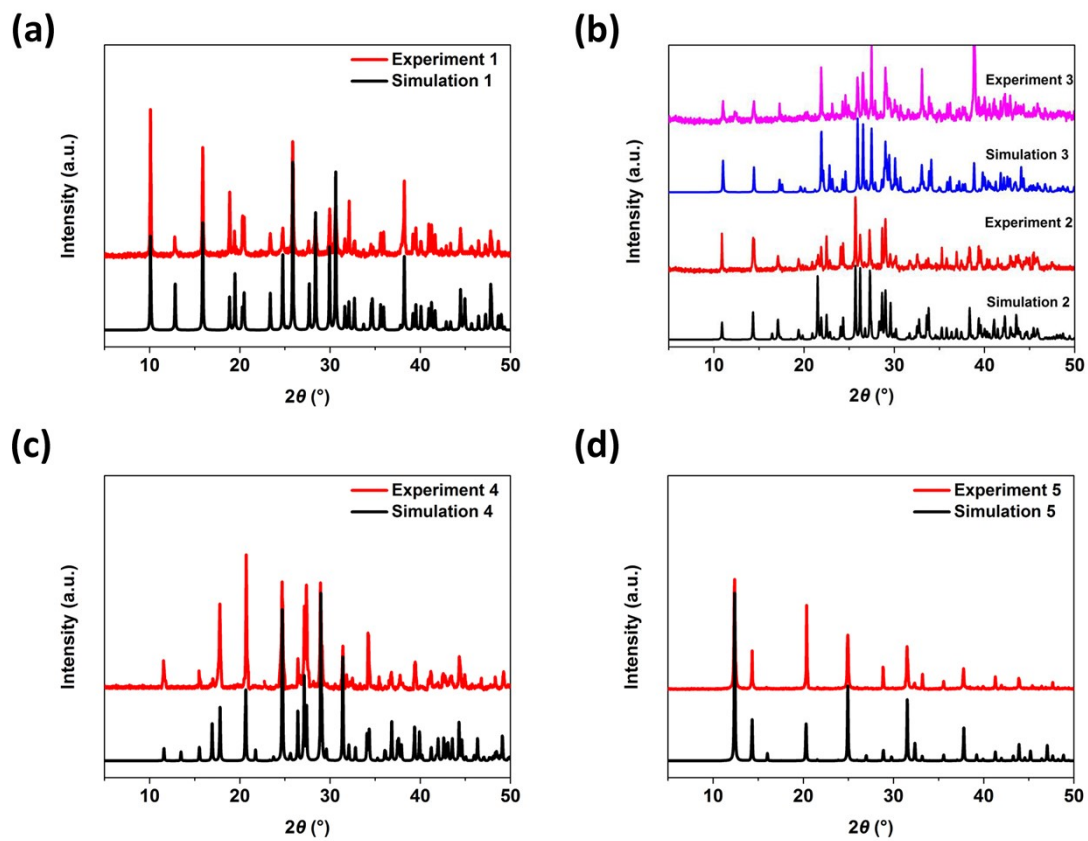

**Fig. S9** PXRD patterns show the comparison between the experimental value and calculated ones for compounds 1(a), 2–3(b), 4(c) and 5(d).

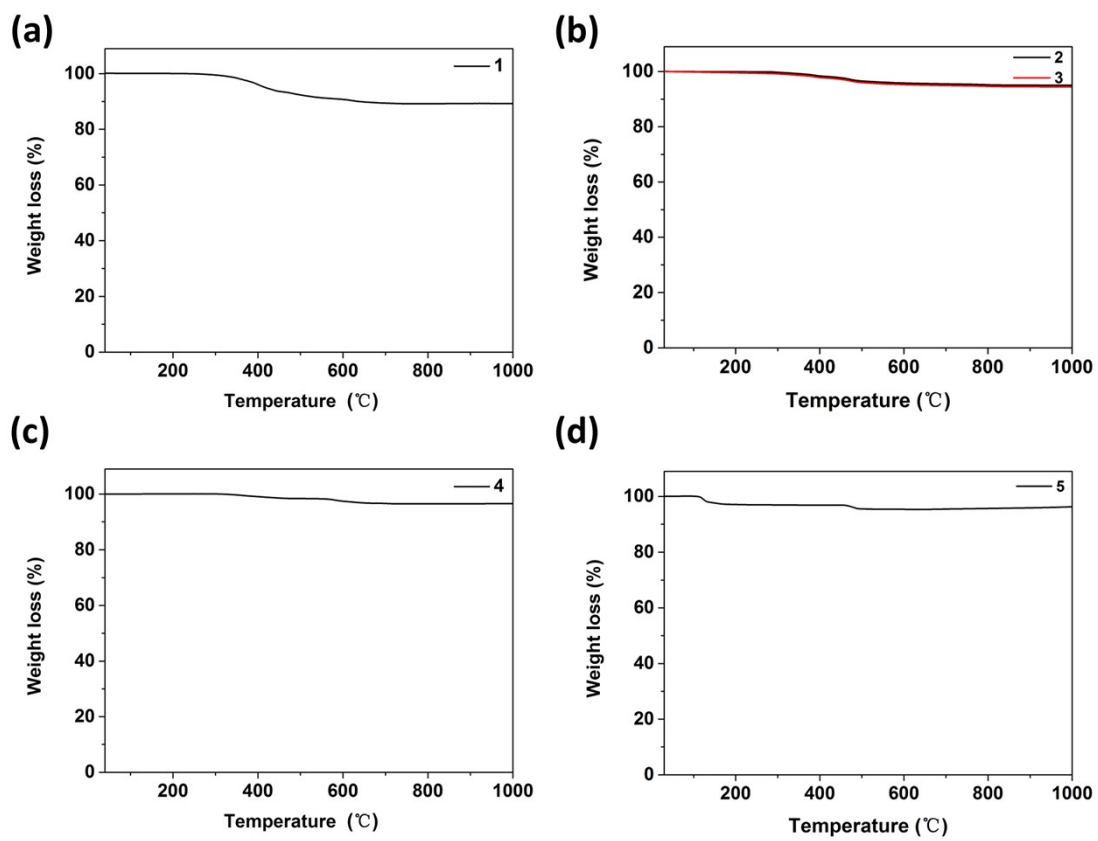

**Fig. S10** TG curves for compounds 1(a), 2–3(b), 4(c) and 5(d).

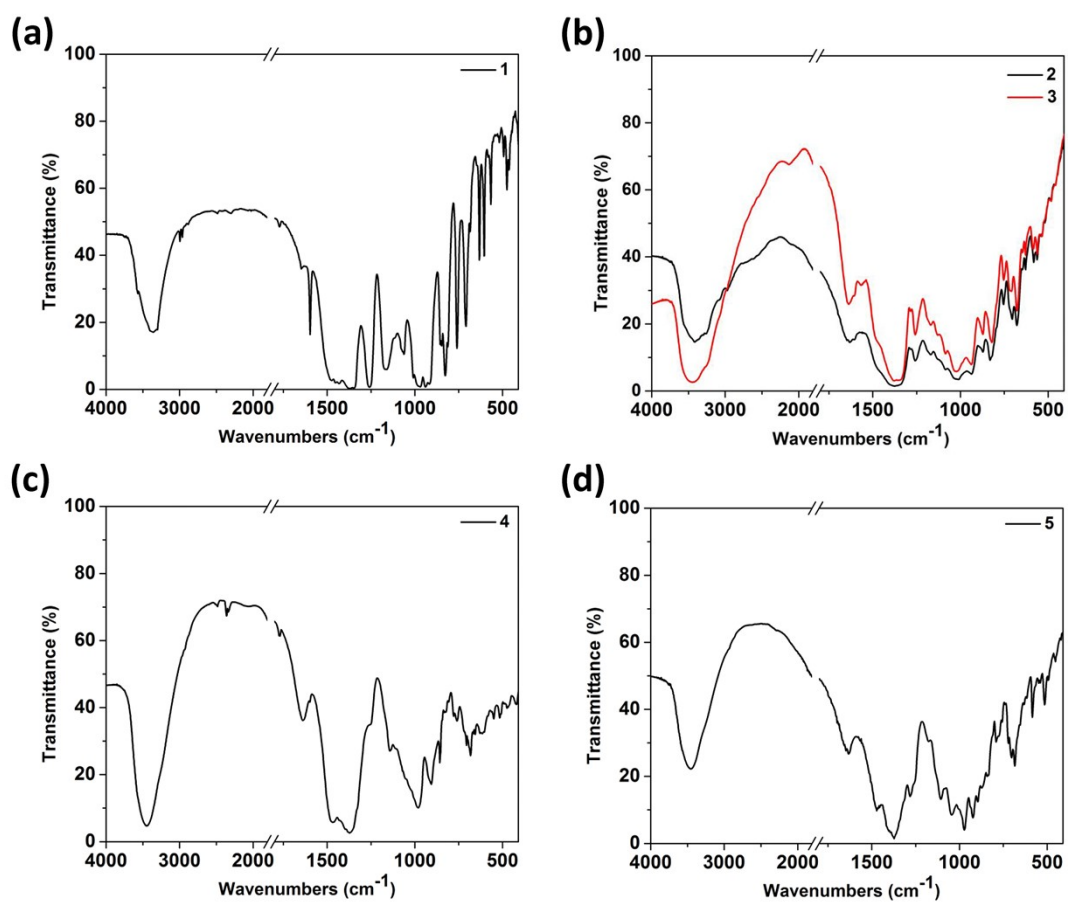

Fig. S11 IR spectra for compounds 1(a), 2–3(b), 4(c) and 5(d).

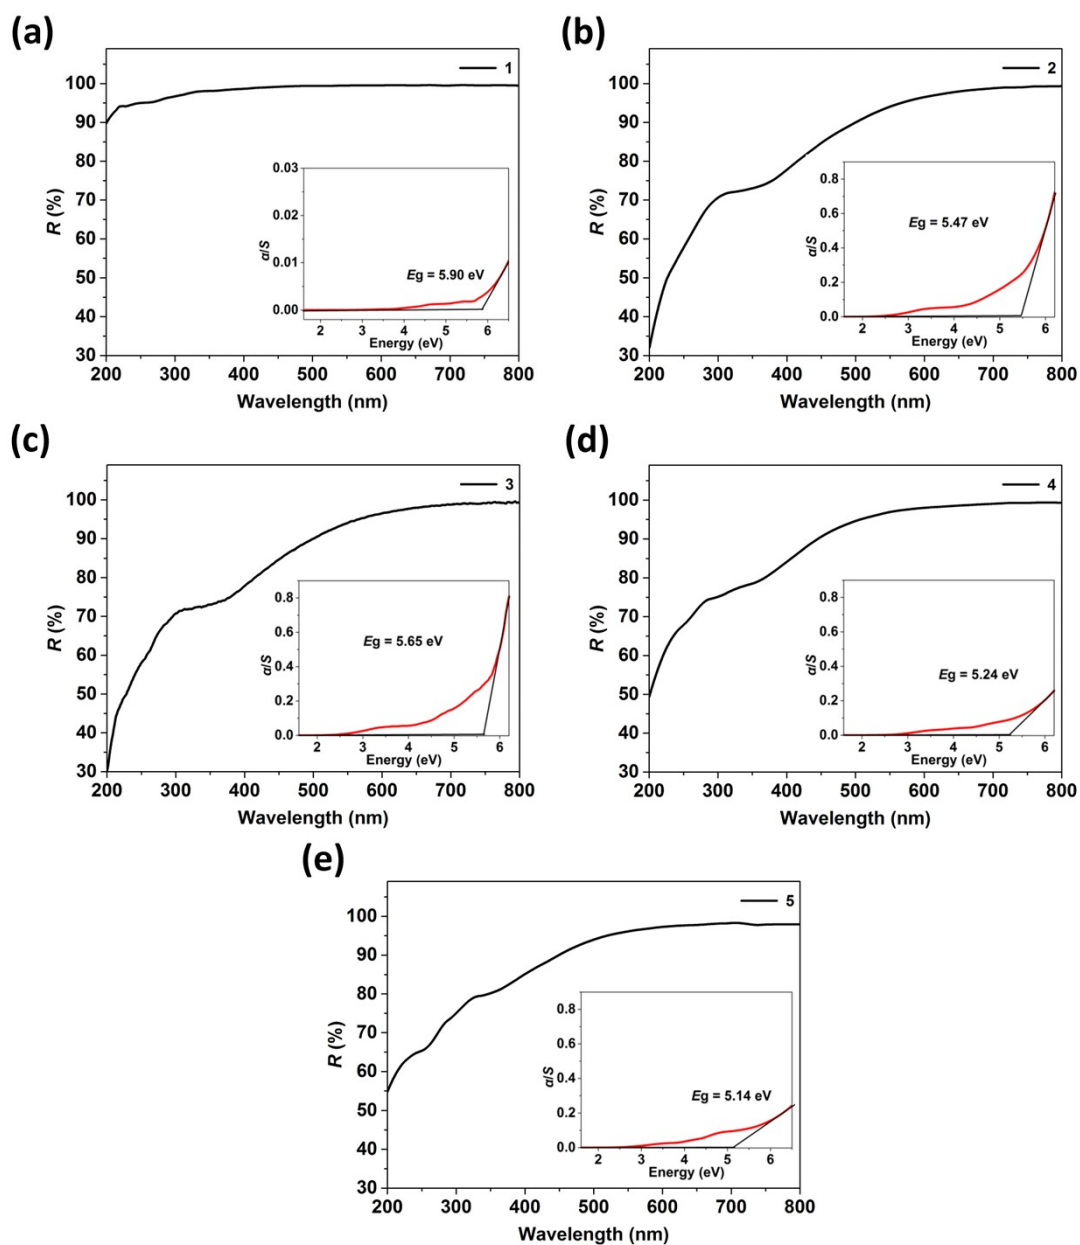

**Fig. S12** UV/Vis diffuse reflectance spectra of compounds 1(a), 2(b), 3(c), 4(d) and 5(e). Inset: plots of  $\alpha/S$  vs.  $E$ .

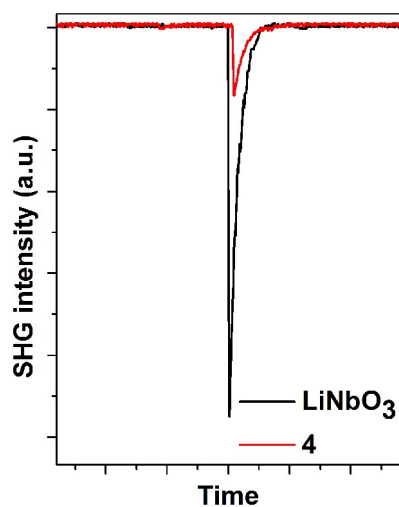

**Fig. S13** Oscilloscope traces of SHG signals for compounds **4** and  $\text{LiNbO}_3$  in the same particle size of 150–212  $\mu\text{m}$ .

**Table S6** The direction and magnitude (in Debye) of the polyhedral dipole moments for compound **1**

| Specie            | <i>a</i>         | <i>b</i>         | <i>c</i>         | Magnitude |
|-------------------|------------------|------------------|------------------|-----------|
| <b>Compound 1</b> |                  |                  |                  |           |
| $\text{NaO}_6$    | $0 \times 2$     | $0 \times 2$     | $\pm 0.02$       | 0.02      |
|                   | $0 \times 4$     | $0 \times 4$     | $0 \times 4$     | 0         |
|                   | <b>0</b>         | <b>0</b>         | <b>0</b>         |           |
| $\text{RbO}_7$    | $-4.84 \times 3$ | $4.75 \times 3$  | $-2.82 \times 3$ | 7.35      |
|                   | $-4.75 \times 3$ | $-9.59 \times 3$ | $-2.82 \times 3$ | 11.11     |
|                   | $-9.59 \times 3$ | $-4.75 \times 3$ | $2.82 \times 3$  | 11.11     |
|                   | $4.84 \times 3$  | $9.59 \times 3$  | $2.82 \times 3$  | 11.11     |
|                   | $4.75 \times 3$  | $-4.84 \times 3$ | $2.82 \times 3$  | 7.35      |
|                   | $9.59 \times 3$  | $4.84 \times 3$  | $-2.82 \times 3$ | 11.11     |
|                   | <b>0</b>         | <b>0</b>         | <b>0</b>         |           |
| $\text{BO}_3$     | $-0.36 \times 2$ | $0.45 \times 2$  | $-0.29 \times 2$ | 0.65      |
|                   | $0.45 \times 2$  | $-0.09 \times 2$ | $-0.29 \times 2$ | 0.54      |
|                   | $-0.09 \times 2$ | $-0.36 \times 2$ | $-0.29 \times 2$ | 0.47      |
|                   | $-0.45 \times 2$ | $0.36 \times 2$  | $0.29 \times 2$  | 0.65      |
|                   | $0.36 \times 2$  | $0.09 \times 2$  | $0.29 \times 2$  | 0.47      |
|                   | $0.09 \times 2$  | $-0.45 \times 2$ | $0.29 \times 2$  | 0.54      |
|                   | 0.09             | -0.45            | 0.33             | 0.56      |
|                   | 0.36             | 0.09             | 0.33             | 0.50      |
|                   | -0.45            | 0.36             | 0.33             | 0.66      |
|                   | -0.36            | 0.45             | -0.33            | 0.66      |
|                   | 0.45             | -0.09            | -0.33            | 0.56      |
|                   | -0.09            | -0.36            | -0.33            | 0.50      |
|                   | <b>0</b>         | <b>0</b>         | <b>0</b>         |           |
| <b>Unit Cell</b>  | <b>0</b>         | <b>0</b>         | <b>0</b>         | <b>0</b>  |
